# Supplementary figures and images for: Cardiovascular disease prevalence and risk factor prevalence in Type 2 diabetes: a contemporary analysis
Source: PubMed Central journal article supplement — Diabet Med. 2018 Oct 10;36(6):718–25. doi: 10.1111/dme.13825 (PMC6585697; doi:10.1111/dme.13825), 2018-10-10

Figure S1 - Risk factors by age

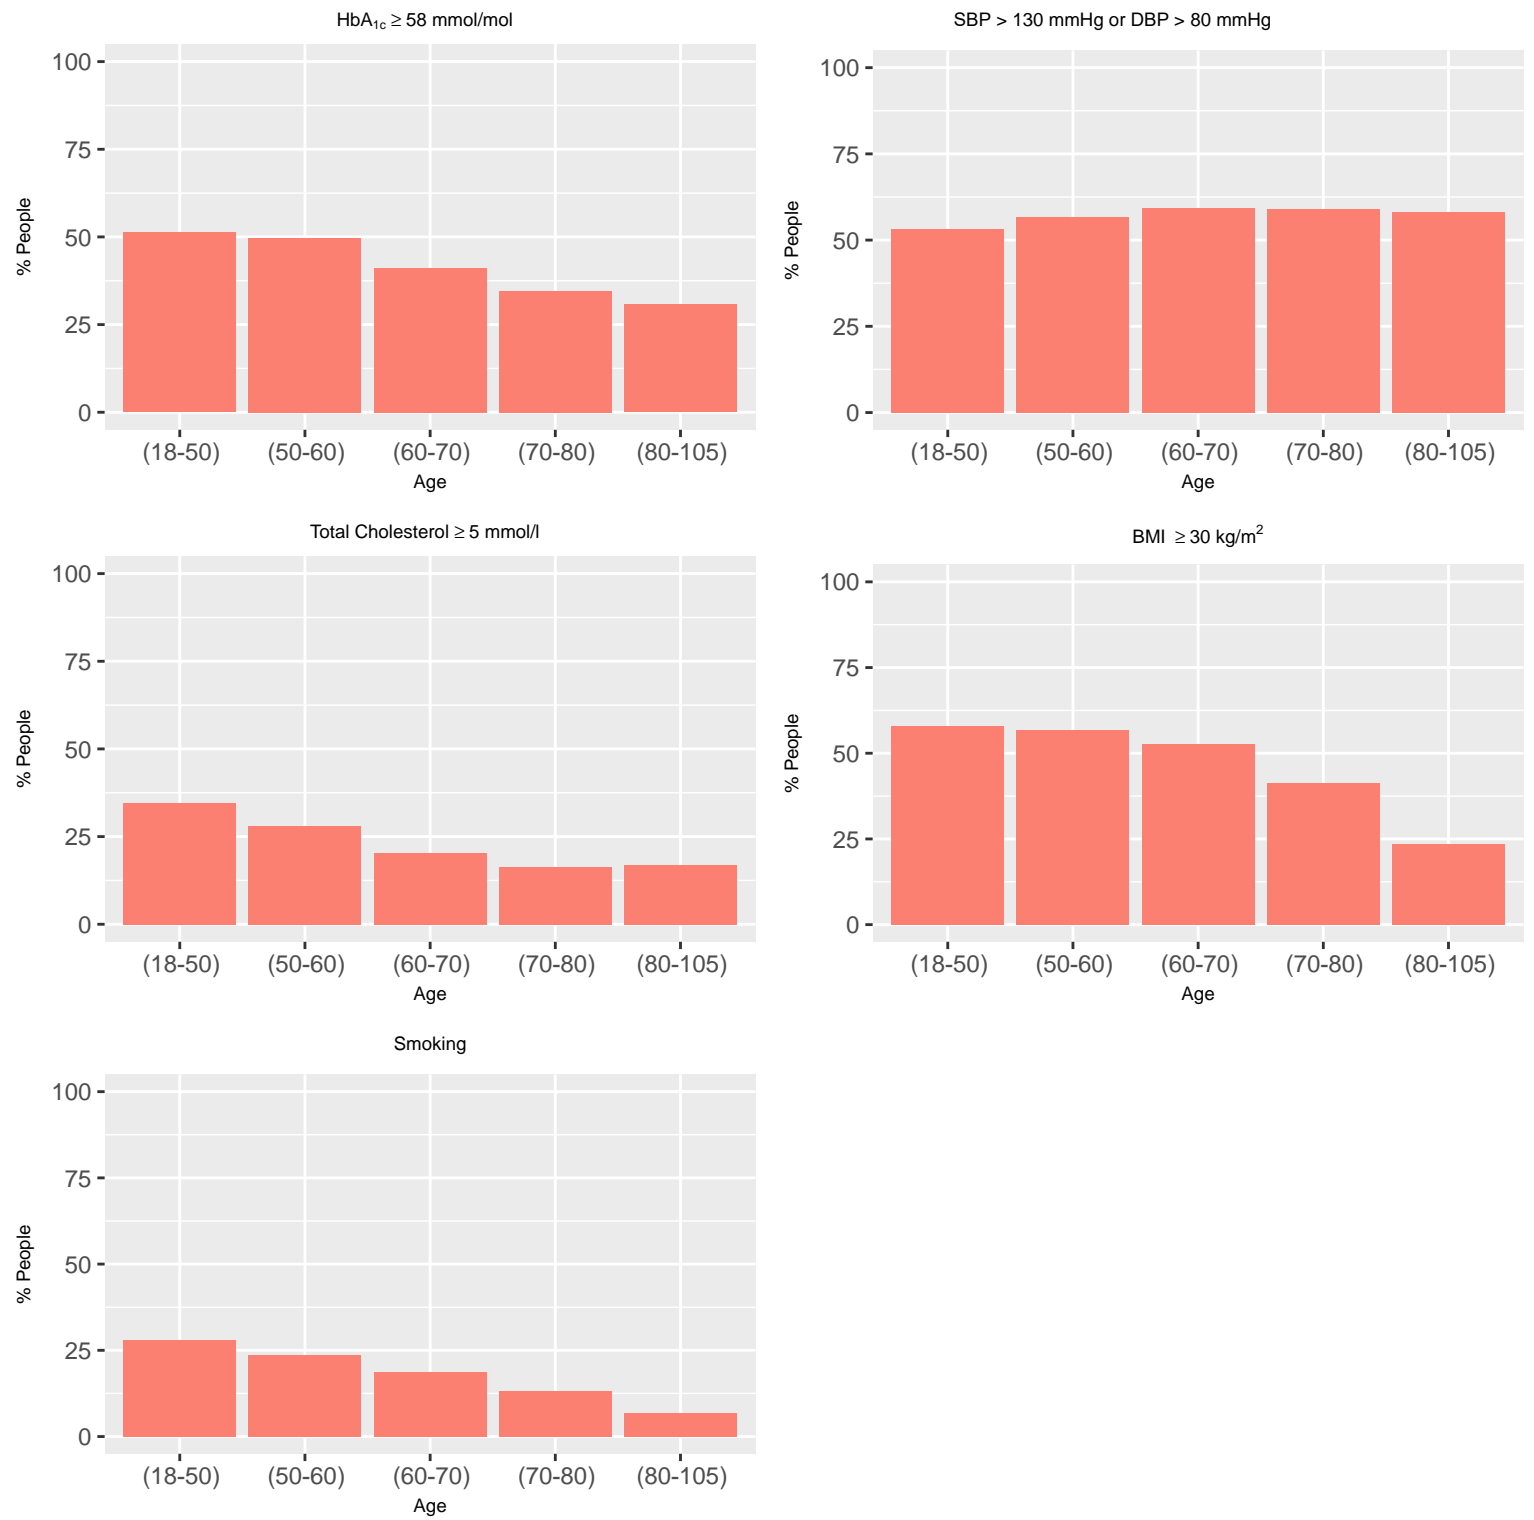

Supplement: DME-36-718-s001.pdf [file DME-36-718-s001.pdf]
